# Supplementary material for: Reconstruction of Holocene oceanographic conditions in the Northeastern Baffin Bay
Source: Copernicus journal article supplement (doi:10.5194/cp-2019-152), 2020-01-10
Supplement: Supplementary file 1 [file cp-2019-152-supplement.pdf]

## 1 S1. Chronology

2 At the radiocarbon dating laboratory (ETH, Zürich), the samples were run twice, measuring  $F^{14}C$   
3 in both the main and leach fraction of each sample, the leach fraction acting as a measure of quality  
4 control (Bard et al., 2015; Wacker et al., 2013). The  $^{14}C$  dates at depths of 700-701 cm and 737-  
5 738 cm, the  $F^{14}C$  were measured only on the leach fractions, since there was no  $CO_2$  in the main  
6 fraction, likely explained by the small sample sizes (see Table S1). Both dated intervals at the  
7 bottom of the core have large uncertainties but they are still in general agreement with the other  
8 dated intervals.

9 **Table S1:**  $F^{14}C$  deviations between the main and leach fractions of the  $^{14}C$  dated intervals.

| Depth (cm) | Lab ID        | Sample description         | Weight ( $\mu$ g) | Fraction       | $F^{14}C$             |
|------------|---------------|----------------------------|-------------------|----------------|-----------------------|
| 4-5cm      | ETH-92277.1.1 | Mixed benthic foraminifera | 600               | main fraction  | 0.915732 $\pm$ 0.0054 |
| 4-5cm      | ETH-92277.2.1 | Mixed benthic foraminifera |                   | leach fraction | 0.911882 $\pm$ 0.0074 |
| 70-71 cm   | ETH-92279.1.1 | Mixed benthic foraminifera | 1030              | main fraction  | 0.799837 $\pm$ 0.0049 |
| 70-71 cm   | ETH-92279.2.1 | Mixed benthic foraminifera |                   | leach fraction | 0.799153 $\pm$ 0.0071 |
| 310-311 cm | ETH-92281.1.1 | Mixed benthic foraminifera | 1320              | main fraction  | 0.539826 $\pm$ 0.0038 |
| 310-311 cm | ETH-92281.2.1 | Mixed benthic foraminifera |                   | leach fraction | 0.543688 $\pm$ 0.0055 |
| 410-411 cm | ETH-92283.1.1 | Mixed benthic foraminifera | 1340              | main fraction  | 0.485369 $\pm$ 0.0036 |
| 410-411 cm | ETH-92283.2.1 | Mixed benthic foraminifera |                   | leach fraction | 0.479396 $\pm$ 0.0051 |
| 580-581 cm | ETH-92285.1.1 | Mixed benthic foraminifera | 1750              | main fraction  | 0.410401 $\pm$ 0.0034 |
| 580-581 cm | ETH-92285.2.1 | Mixed benthic foraminifera |                   | leach fraction | 0.405557 $\pm$ 0.0067 |
| 700-701 cm | ETH-92286.1.1 | Mixed benthic foraminifera | 750               | main fraction  | -                     |
| 700-701 cm | ETH-92286.2.1 | Mixed benthic foraminifera |                   | leach fraction | 0.357202 $\pm$ 0.0173 |
| 737-738 cm | ETH-92287.1.1 | Mixed benthic foraminifera | 500               | main fraction  | -                     |
| 737-738 cm | ETH-92287.2.1 | Mixed benthic foraminifera |                   | leach fraction | 0.347568 $\pm$ 0.0067 |

10

## 11 Supplementary references

12 Bard, E., Tuna, T., Fagault, Y., Bonvalot, L., Wacker, L., Fahrni, S. and Synal, H. A.: AixMICADAS, the accelerator mass  
13 spectrometer dedicated to  $^{14}C$  recently installed in Aix-en-Provence, France, Nucl. Instruments Methods Phys. Res. Sect. B Beam  
14 Interact. with Mater. Atoms, doi:10.1016/j.nimb.2015.01.075, 2015.

15 Wacker, L., Lippold, J., Molnár, M. and Schulz, H.: Towards radiocarbon dating of single foraminifera with a gas ion source, in  
16 Nuclear Instruments and Methods in Physics Research, Section B: Beam Interactions with Materials and Atoms., 2013.

17
